# Supplementary material for: The Natural History of Class I Primate Alcohol Dehydrogenases Includes Gene Duplication, Gene Loss, and Gene Conversion
Source: PLoS One. 2012 Jul 31;7(7):e41175. doi: 10.1371/journal.pone.0041175 (PMC3409193; doi:10.1371/journal.pone.0041175)
Supplement: Figure S11 — Summary of micro-indels in the concatenated intronic dataset coded as binary data. Micro-indels that are generally informative for the human/OWM/NWM ADH1A clade are highlighted yellow. Similarly, micro-indels that are generally informative for the human/OWM/NWM ADH1B clade are highlighted green, and micro-indels that are generally informative for the human/OWM/NWM ADH1C clade are highlighted blue. Micro-indels that are generally informative for the Mac_ADH1.0/Mar_ADH1.1 clade are highlighted red. Micro-indels that are generally informative for both the human/OWM/NWM ADH1A clade and the Mac_ADH1.0/Mar_ADH1 clade are highlighted orange. Micro-indels that are suggestive of gene conversion are highlighted according to the source of the micro-indel (i.e. green if the micro-indel is generally informative of the human/OWM/NWM ADH1B clade), or highlighted purple, pink or grey when the source is undetermined. Micro-indels that are shared by both the Cal_ADH1.1 and Cal_ADH1.2 clade are highlighted orange. Missing data (from a gap in the alignment) is denoted with a period. (XLS) [file pone.0041175.s011.xls]

## Sheet: micoindels coded as binary data
paralog / intron:	#1																																									#1
Mac.1.0	.	.	.	.	.	.	.	.	.	.	.	.	.	.	.	.	.	.	.	.	.	.	1	1	1	0	1	0	1	1	1	1	1	1	1	0	1	1	1	1	1	1
Cal.1.1	1	0	1	0	1	1	0	1	1	1	1	0	0	0	0	0	1	0	.	.	1	1	1	1	1	0	1	0	1	1	1	1	1	1	1	0	1	1	1	1	1	1
human.1A	1	0	1	1	1	1	0	1	0	1	1	0	0	0	0	1	1	0	1	0	1	1	0	1	1	0	1	1	1	1	1	1	0	1	1	0	1	1	1	1	0	0
Mac.1.1	1	0	1	1	1	1	0	1	0	1	1	0	0	0	0	1	1	0	1	0	1	1	0	1	1	0	0	1	1	1	1	1	0	1	1	.	1	1	1	1	0	0
Cal.1.2	1	0	1	.	1	1	0	1	1	1	.	0	0	0	0	1	1	0	1	.	.	.	.	1	1	1	0	0	1	1	1	1	0	1	0	0	1	1	1	1	1	1
human.1B	1	1	0	0	0	1	1	0	1	0	.	.	.	.	.	.	.	.	.	.	.	.	1	0	1	1	1	0	0	1	1	0	1	1	1	0	1	1	0	0	.	1
Mac.1.2	0	1	0	2	0	1	1	0	0	0	0	1	0	1	0	0	0	1	1	0	1	0	1	0	.	1	1	0	0	1	1	0	1	1	1	1	1	1	0	0	.	1
Mac.1.3	0	1	0	2	0	1	1	0	0	0	0	1	0	1	0	0	0	1	1	0	1	0	1	0	1	1	1	0	0	1	1	0	1	1	1	1	1	1	0	0	.	1
Cal.1.3	1	1	1	3	0	1	1	0	0	0	0	1	0	1	0	0	1	0	.	.	.	.	.	.	.	.	.	.	.	.	.	.	.	.	.	.	.	.	0	.	.	1
human.1C	1	1	1	1	0	0	1	1	0	1	1	1	1	0	1	0	1	0	0	1	0	1	1	1	0	0	1	0	1	0	0	1	1	.	0	0	0	0	1	1	1	1
Mac.1.4	1	1	1	1	0	0	1	1	0	1	1	1	1	0	1	0	1	0	0	1	0	1	1	1	0	0	1	0	1	0	0	1	1	0	1	0	0	0	1	1	0	1
Cal.1.4	1	1	1	1	0	0	1	1	0	1	1	1	1	0	0	.	.	0	0	1	0	1	1	1	0	0	1	0	1	1	0	1	1	0	0	0	1	0	1	1	1	1
position (within intron)	250	395	412	424	498	508	682	710	793	885	925	1010	1025	1110	1115	1250	1260	1305	1395	1440	1530	1531	1770	1853	1913	2070	2160	2314	2325	2359	2414	2545	2548	2565	2605	2645	2720	2765	2893	2913	2916	2968
position (within concatenated alignment)	250	395	412	424	498	508	682	710	793	885	925	1010	1025	1110	1115	1250	1260	1305	1395	1440	1530	1531	1770	1853	1913	2070	2160	2314	2325	2359	2414	2545	2548	2565	2605	2645	2720	2765	2893	2913	2916	2968
paralog / intron:	#2											#2		#3																												#3
Mac.1.0	1	1	.	0	1	1	1	0	1	1	1	1		2	1	1	1	0	1	0	1	0	0	1	0	0	1	0	1	0	0	0	0	.	1	0	2	1	1	1	.	.
Cal.1.1	1	1	1	0	1	1	1	0	0	1	1	1		1	1	0	1	0	0	0	0	0	0	1	0	0	1	0	1	0	1	0	0	.	1	0	0	0	1	0	0	0
human.1A	1	1	1	0	1	1	0	1	0	1	1	1		0	1	1	1	0	1	0	0	0	0	1	1	0	1	1	0	0	0	0	0	.	1	0	0	1	1	1	1	0
Mac.1.1	1	1	1	.	1	1	0	1	0	1	1	1		0	0	1	0	1	1	0	0	0	0	1	1	0	1	1	0	0	1	0	0	.	1	0	0	1	1	1	1	1
Cal.1.2	1	1	1	0	1	1	1	1	1	1	1	1		1	1	0	1	0	0	0	0	0	0	1	0	0	1	0	1	0	1	0	1	0	1	0	0	0	1	0	0	0
human.1B	0	1	1	1	1	0	1	1	1	0	1	0		2	1	1	1	0	1	1	1	1	1	1	0	1	0	0	0	1	1	1	1	0	1	1	0	1	1	1	0	0
Mac.1.2	0	1	0	1	1	0	1	1	1	0	1	0		0	0	1	0	1	1	0	0	0	0	1	1	0	1	1	0	0	1	0	0	.	1	0	0	1	1	1	1	1
Mac.1.3	0	1	0	1	1	0	1	1	1	0	1	0		2	1	1	1	0	1	1	1	1	1	1	0	1	0	0	0	1	1	1	1	0	1	1	0	1	1	1	0	0
Cal.1.3	0	1	1	1	1	0	1	1	1	1	0	1		1	1	0	1	0	1	1	0	1	1	1	0	1	0	0	0	1	1	1	1	0	1	1	0	1	1	1	0	0
human.1C	1	0	1	1	0	1	1	1	1	1	0	1		1	1	1	1	0	1	0	0	1	0	0	0	1	0	0	0	1	1	1	1	1	0	1	1	1	0	1	0	0
Mac.1.4	1	0	1	1	2	1	1	1	1	1	0	1		1	1	1	1	0	1	0	0	1	0	0	0	1	1	0	0	1	1	1	1	1	0	1	1	1	0	1	0	0
Cal.1.4	1	0	1	1	0	1	1	1	1	1	0	1		1	1	0	1	0	0	0	0	1	0	1	0	1	1	0	0	1	1	.	1	1	0	1	.	0	0	1	0	0
position (within intron)	7	10	55	88	110	125	145	182	261	305	318	521		30	71	303	323	349	365	372	597	670	739	810	820	890	923	940	1037	1070	1237	1285	1360	1370	1402	1403	1547	1603	1622	1631	1645	1683
position (within concatenated alignment)	3124	3127	3172	3205	3227	3242	3262	3299	3378	3422	3435	3638		3714	3755	3987	4007	4033	4049	4056	4281	4354	4423	4494	4504	4574	4607	4624	4721	4754	4921	4969	5044	5054	5086	5087	5231	5287	5306	5315	5329	5367
paralog / intron:	#5																														#5		#6													#6
Mac.1.0	1	0	1	0	1	1	1	0	1	1	0	0	0	1	1	1	0	1	1	1	0	0	0	1	.	0	0	0	1	1	1		1	1	1	1	0	0	1	1	0	0	0	1	1	1
Cal.1.1	1	0	1	0	1	1	1	0	1	1	0	0	0	1	1	1	0	1	1	1	1	0	1	1	1	1	0	0	0	1	1		1	1	1	1	0	0	1	1	0	0	2	.	1	1
human.1A	0	1	1	0	1	0	1	1	0	0	1	0	1	0	1	1	1	1	1	0	1	1	1	1	1	0	1	0	0	1	.		1	1	1	1	0	0	0	1	1	0	0	1	1	1
Mac.1.1	0	1	1	0	1	1	.	.	.	.	.	.	.	.	1	1	1	1	1	0	1	1	1	1	1	0	1	0	0	1	1		1	1	1	1	0	0	0	1	1	0	1	1	1	1
Cal.1.2	1	0	0	0	0	1	.	1	0	1	0	0	1	0	1	1	1	1	1	1	1	1	1	0	1	1	1	0	0	1	1		1	1	1	1	0	0	1	1	1	0	0	1	1	1
human.1B	1	0	1	0	1	0	1	1	0	1	1	1	1	0	1	0	0	1	1	1	0	1	1	1	1	1	1	0	1	1	1		1	0	1	1	1	1	1	1	1	1	0	.	.	.
Mac.1.2	0	1	1	0	1	1	1	1	0	1	1	1	1	0	0	0	0	0	0	1	0	1	1	1	1	1	1	0	1	1	1		0	0	1	0	1	1	1	1	1	1	0	1	1	0
Mac.1.3	1	0	1	0	1	1	1	1	0	1	1	1	1	0	0	0	0	0	0	1	0	1	1	1	1	1	1	0	1	1	0		0	0	1	0	1	1	1	1	1	1	0	1	1	0
Cal.1.3	1	0	0	0	0	1	0	1	0	1	1	0	1	0	1	1	0	1	1	1	1	1	1	1	1	0	1	0	0	1	1		1	1	1	1	0	0	1	1	1	.	0	1	1	1
human.1C	1	0	1	1	1	0	1	1	0	0	1	0	1	0	1	1	1	1	1	1	1	1	1	1	0	0	1	1	1	0	1		1	1	0	1	0	0	1	0	1	0	0	0	0	1
Mac.1.4	1	0	1	1	1	0	1	.	0	1	1	0	1	0	.	.	.	.	.	1	1	1	1	1	0	0	1	1	1	0	0		1	1	0	1	0	0	1	0	1	0	0	0	0	1
Cal.1.4	1	0	1	1	1	0	0	1	0	1	1	0	1	0	1	1	1	1	1	0	0	1	0	0	1	1	1	0	1	1	1		1	1	0	1	0	0	1	0	1	0	1	1	0	1
position (within intron)	175	183	207	268	275	348	502	560	585	600	675	738	755	777	895	905	985	1080	1155	1190	1245	1335	1383	1435	1528	1620	1669	1765	1770	1771	1818		125	150	285	354	595	615	635	854	971	1560	1625	1750	1785	1805
position (within concatenated alignment)	5683	5691	5715	5776	5783	5856	6010	6068	6093	6108	6183	6246	6263	6285	6403	6413	6493	6588	6663	6698	6753	6843	6891	6943	7036	7128	7177	7273	7278	7279	7326		7483	7508	7643	7712	7953	7973	7993	8212	8329	8918	8983	9108	9143	9163
paralog / intron:	#7									#7		#8																										#8
Mac.1.0	1	0	1	1	1	0	1	0	1	1		0	1	0	1	1	1	1	1	1	1	1	1	1	1	1	1	1	1	1	.	0	0	1	0	1	.	.
Cal.1.1	1	0	1	1	1	0	1	0	1	1		0	1	0	1	1	1	0	1	1	1	1	1	1	1	1	.	.	.	.	1	0	0	1	0	1	1	1
human.1A	1	0	0	0	1	1	0	1	1	0		0	1	1	1	1	1	1	1	0	1	1	0	1	0	1	1	1	1	1	1	1	1	1	0	1	1	0
Mac.1.1	1	0	0	0	1	1	0	1	1	0		0	1	1	1	1	1	1	1	0	1	1	0	1	0	1	1	1	1	1	0	1	1	1	0	1	1	0
Cal.1.2	1	0	1	0	0	1	1	1	1	0		0	0	0	1	1	1	.	.	0	1	1	0	1	0	0	0	1	1	1	1	1	1	1	.	1	1	0
human.1B	1	0	1	1	1	1	1	1	1	0		1	0	0	1	1	0	1	1	1	1	0	1	0	0	1	1	1	1	1	1	1	1	0	.	.	0	1
Mac.1.2	1	0	1	1	1	1	1	1	0	0		1	0	0	1	0	0	1	1	1	1	0	1	0	0	1	0	1	1	1	1	1	1	0	.	.	0	1
Mac.1.3	1	0	1	1	1	1	1	1	0	0		1	0	0	1	0	0	1	1	1	1	0	1	0	0	1	0	1	1	1	1	1	1	0	.	.	0	1
Cal.1.3	1	0	1	1	0	1	1	1	1	0		0	0	.	1	1	0	1	1	1	1	1	0	1	0	0	1	1	1	1	1	1	1	1	0	.	0	1
human.1C	0	1	1	0	1	1	1	1	1	0		0	0	0	0	1	1	1	0	1	0	1	1	1	1	1	0	0	1	0	0	1	1	1	1	0	1	1
Mac.1.4	0	1	1	0	1	1	.	.	1	0		0	0	0	0	1	1	0	0	1	0	1	1	1	1	1	0	0	0	0	0	1	1	1	1	0	1	1
Cal.1.4	1	1	1	0	0	1	1	1	1	0		0	0	0	0	1	.	1	0	1	0	1	1	1	1	1	1	0	0	0	0	1	1	1	1	1	1	1
position (within intron)	130	158	335	349	398	400	490	491	530	552		58	91	137	550	648	895	995	1132	1307	1445	1465	1485	1490	1515	1544	1678	1693	1741	1763	1830	2000	2010	2122	2125	2339	2340	2410
position (within concatenated alignment)	9599	9627	9804	9818	9867	9869	9959	9960	9999	10021		10123	10156	10202	10615	10713	10960	11060	11197	11372	11510	11530	11550	11555	11580	11609	11743	11758	11806	11828	11895	12065	12075	12187	12190	12404	12405	12475
